# Supplementary material for: Phytotoxicity of zinc oxide nanoparticles and multi-walled carbon nanotubes, alone or in combination, on Arabidopsis thaliana and their mutual effects on oxidative homeostasis
Source: PubMed Central journal article supplement (PMC9931106; doi:10.1371/journal.pone.0281756), 2023-02-15
Supplement: pone.0281756.s001.pdf [file pone.0281756.s001.pdf]

1  
2

**S1 Table. The information of ZnO NPs and MWCNTs provided by the manufacturer.**

| <b>Nanomaterials</b> | <b>Particle size (nm)</b> | <b>Purity (%)</b>          | <b>Density (g/cm<sup>3</sup>)</b> | <b>Special surface area (m<sup>2</sup>/g)</b> | <b>Manufacturer</b> | <b>CAS number /Model</b>                 |             |
|----------------------|---------------------------|----------------------------|-----------------------------------|-----------------------------------------------|---------------------|------------------------------------------|-------------|
| <b>ZnO</b>           | Φ90                       | 90 ± 10                    | >99.8                             | 5.61                                          | 15-25               | Shanghai Macklin<br>Biochemical Co., Ltd | Z820773     |
|                      | Φ200                      | 200                        | >99.9                             | 5.61                                          | ---                 | (Shanghai, China)                        | Z820825     |
| <b>MWCNTs</b>        | Φ1020                     | OD: 10-20<br>Length: <2 μm | >97                               | 0.27-0.40                                     | 100-160             | Shenzhen Nanotech<br>Port Co. Ltd        | S-MWNT-1020 |
|                      | Φ2040                     | OD: 20-40<br>Length: <2 μm | >97                               | 0.03-0.16                                     | 70-150              | (Shenzhen, China)                        | S-MWNT-2040 |
|                      | Φ4060                     | OD: 40-60<br>Length: <2 μm | >97                               | 0.03-0.16                                     | 60-160              |                                          | S-MWNT-4060 |

3
