# Supplementary material for: Phytotoxicity of zinc oxide nanoparticles and multi-walled carbon nanotubes, alone or in combination, on Arabidopsis thaliana and their mutual effects on oxidative homeostasis
Source: PubMed Central journal article supplement (PMC9931106; doi:10.1371/journal.pone.0281756), 2023-02-15
Supplement: pone.0281756.s002.pdf [file pone.0281756.s002.pdf]

**S2 Table. Primers used for qRT-PCR analysis.**

| Genes           | Primer Sequences for qRT-PCR (5'–3' ) |                            |
|-----------------|---------------------------------------|----------------------------|
|                 | F                                     | R                          |
| <i>AtFSD1</i>   | CTCAAGCCACCTCCATTCG                   | GCGTTGTTGAAAGCAGGGA        |
| <i>AtFSD2</i>   | TGGATTATCACTGGGGCAAAC                 | GGATAGACTCCCAGAAGAACTCG    |
| <i>AtFSD3</i>   | GTGAACCCAACATCCCAATCG                 | TTGCGTCACTAACATTACTGTCACC  |
| <i>AtCSD1</i>   | AGTAACCAAAGAGAGACGAAGCA               | CCTTCCTGGGTGAAAAAGATAG     |
| <i>AtCSD2</i>   | CGAAGGAGTTGTTACTTTGACCC               | GAACCACAAAGGCTCTTCCAAC     |
| <i>AtMSD1</i>   | GTTTGGGAGCACGCCTACTAC                 | G TTCATCTCCTTATGTCATCGTGTA |
| <i>AtCAT1</i>   | CGCCGATTTGCGAGATACA                   | ACCCTCTCAGGAATCCGCTC       |
| <i>AtCAT2</i>   | TATCCAACCTCCGCCTGCTGTCT               | ATGCGTGGGTCGGATAGGG        |
| <i>AtCAT3</i>   | GGTGACACTCAGAGACATCGCC                | AAACCTGTCTTGCCTGTCTGG      |
| <i>AtGSH1</i>   | TTTGAGCAGTATGTTGACTACGCAC             | GCAGTTCACCAGGGAGACAGG      |
| <i>AtGSH2</i>   | GGAAATGCTTTGCTGGGC                    | TCTCCATAGATGTTGTTTCCTCC    |
| <i>At-Actin</i> | CAGTGGTGGTGAATGAGTAGCC                | CAAAAGCAAACAGAGAAAAGATGA   |
